# Supplementary material for: A preliminary assessment of the ForenSeq™ FGx System: next generation sequencing of an STR and SNP multiplex
Source: Springer Nature journal article supplement (doi:10.1007/s00414-016-1457-6), 2016-10-26

**Supplementary Material**

**Table S1:** Ancestry comparison of all concordance experiment samples (15 samples total), each with the top 3 ranking ancestry predictions for 23andMe and the most likely population listed first with the following populations that are within an order of magnitude of the highest likelihood (likelihood ratio listed) for FROG-kb (KiddLab – Set of 55 AISNPs). Sample 09 did not include rs1079597 or rs1426654 because they had dropped-out.

| **Sample** | **Self-Reported Ethnicity** | **FROG-kb Ancestry** | **ForenSeq™ Ancestry** | **23andMe Ancestry** |
| --- | --- | --- | --- | --- |
| 01 | German | Iberian  Iranians (2.1) | European | 99.9% European  33.3% Broadly Northern European  18.5% French & German |
| 02 | German | Iberian  Iranians (9.3) | European | 99.9% European  36.8% Broadly Northern European  14.7% British & Irish |
| 03 | Irish & German | Roman Jews  Ashkenazi Jews (4.2)  Russians_Archangel’sk (9.4) | European | 99.9% European  33.5% British & Irish  33.4% French & German |
| 04 | British & Irish | Danes  Mixed Europeans (1.0)  Iberian (1.1)  Irish (1.1)  British (1.2)  Kairoun_Tunisia (2.1)  Finns (3.2)  Mixed Europeans (3.9) | European | 100% European  39.4% British & Irish  30.9% Broadly Northern European |
| 05 | Irish | Iberian  Finns (1.1)  Kesra_Tunisia (2.1)  Mehdia_Tunisia (2.4)  Iranians (4.8)  Russians_Archangel’sk (6.1) | European | 99.7% European  22.4% Broadly Northern European  17.4 % British & Irish |
| 06 | Irish | Roman Jews  Russian_Archangel’sk (2.5)  Mehdia_Tunisia (6.2)  Iberian (8.2)  Finns (8.4) | European | 99.9% European  45.8% British & Irish  25.8% Broadly Northern European |
| 07 | French & German | Russian_Archangel’sk  Finns (1.4)  Danes (3.9) | European | 99.9% European  40.7% Broadly Northern European  20.5% French & German |
| 08 | Irish & Polish | Roman Jews  Iberian (5.0) | European | 99.8% European  29.7% Eastern European  29.5% Broadly Northern European |
| 09 | Middle Eastern | Keralite  Sonowal Kachari (6.6)  Negroid Makrani (10.0) | Ad Mixed American | 54.8% South Asian  32.6% Middle Eastern  8.6% North African |
| 10 | Middle Eastern | Mehdia_Tunisia  Kerkennah_Tunisia (3.9) | Ad Mixed American | 89.8% Middle Eastern & North African  86.1% Middle Eastern  3% North African |
| 11 | Taiwanese | Jing (Guangxi)  Japanese (4.1)  Han (4.3)  Dong (Guangxi) (5.0)  Hakka (7.7)  Taiwanese Han (9.4) | East Asian | 99.8% East Asian & Native American  99.4% Chinese  0.4% Southeast Asian |
| 12 | Italian & Irish | Russians_Archangel’sk  Finns (1.1)  Iberian (3.0)  Danes (3.2)  British (4.2)  Roman Jews (9.5) | European | 99.7% European  28.8% Broadly Northern European  23.6% Italian |
| 13 | Irish & French | Irish  Finns (1.6)  Iberian (3.5)  Danes (3.5)  Russians_Archangel’sk (5.7)  Mixed Europeans (9.7) | European | 92.4% European  38.2% British & Irish  23.7% Broadly Northern European |
| 14 | Irish & Eastern European | Danes  Finns (1.3)  Iberian (3.1)  Mixed Europeans (5.1)  Russians (7.1)  Chuvash (9.6) | European | 99.8% European  46.6% British & Irish  28.6% Broadly Northern European |
| 15 | Irish & German | Iberian  Danes (2.8)  Mixed Europeans (8.4) | European | 99.2% European  43.8% British & Irish  27.1% Broadly Northern European |

**Table S2:** Random match probability (RMP) calculated for all samples from the concordance experiment using complete autosomal STR genotypes. CODIS RMP calculations were determined using the 13 designated loci currently used in national databases. ForenSeq™ RMP calculations were determined using the 27 autosomal loci in the ForenSeq™ Signature Prep Kit. Sample 08 did not include loci D16S539 and CSF1PO and sample 09 did not include loci D7S820, CSF1PO, THO1, D13S317, D16S539, vWA, TPOX, and D18S51 for the CODIS RMP calculation due to drop out. Samples 09 and 10 did not include the Penta E locus for the ForenSeq™ RMP calculation due to drop out.

| **Sample** | **Database [25]** | **RMP (ForenSeq™)** | **Database [31]** | **RMP (CODIS)** |
| --- | --- | --- | --- | --- |
| 01 | Caucasian  African American  Asian  Hispanic | 1 in 2.7E+30  1 in 8.0E+31  1 in 1.2E+31  1 in 1.3E+30 | Caucasian  African American  Southwest Hispanic  Southeast Hispanic | 1 in 3.1E+16  1 in 1.2E+17  1 in 9.0E+16  1 in 4.3E+16 |
| 02 | Caucasian  African American  Asian  Hispanic | 1 in 1.7E+32  1 in 2.7E+33  1 in 2.2E+32  1 in 1.5E+32 | Caucasian  African American  Southwest Hispanic  Southeast Hispanic | 1 in 1.4E+18  1 in 1.8E+18  1 in 7.1E+18  1 in 9.0E+17 |
| 03 | Caucasian  African American  Asian  Hispanic | 1 in 8.7E+31  1 in 5.0E+34  1 in 1.3E+35  1 in 7.8E+31 | Caucasian  African American  Southwest Hispanic  Southeast Hispanic | 1 in 3.1E+16  1 in 8.3E+16  1 in 1.0E+17  1 in 2.0E+16 |
| 04 | Caucasian  African American  Asian  Hispanic | 1 in 4.1E+30  1 in 2.1E+35  1 in 1.3E+31  1 in 5.7E+31 | Caucasian  African American  Southwest Hispanic  Southeast Hispanic | 1 in 2.1E+17  1 in 4.3E+20  1 in 2.8E+17  1 in 5.0E+17 |
| 05 | Caucasian  African American  Asian  Hispanic | 1 in 7.1E+28  1 in 4.0E+31  1 in 2.6E+30  1 in 2.6E+29 | Caucasian  African American  Southwest Hispanic  Southeast Hispanic | 1 in 3.1E+15  1 in 1.2E+15  1 in 1.9E+16  1 in 9.0E+14 |
| 06 | Caucasian  African American  Asian  Hispanic | 1 in 2.5E+29  1 in 3.4E+31  1 in 2.2E+32  1 in 1.7E+30 | Caucasian  African American  Southwest Hispanic  Southeast Hispanic | 1 in 8.3E+15  1 in 7.6E+15  1 in 6.6E+16  1 in 1.6E+16 |
| 07 | Caucasian  African American  Asian  Hispanic | 1 in 1.0+29  1 in 1.3E+32  1 in 6.0E+34  1 in 3.5E+29 | Caucasian  African American  Southwest Hispanic  Southeast Hispanic | 1 in 1.oE+14  1 in 4.0E+14  1 in 2.5E+15  1 in 3.4E+14 |
| 08 | Caucasian  African American  Asian  Hispanic | 1 in 1.4E+31  1 in 5.3E+35  1 in 4.0E+35  1 in 8.4E+31 | Caucasian  African American  Southwest Hispanic  Southeast Hispanic | 1 in 1.7E+13  1 in 2.0E+15  1 in 5.8E+13  1 in 1.6E+13 |
| 09 | Caucasian  African American  Asian  Hispanic | 1 in 4.1E+30  1 in 1.7E+32  1 in 4.5E+30  1 in 1.1E+31 | Caucasian  African American  Southwest Hispanic  Southeast Hispanic | 1 in 1.0E+07  1 in 1.6E+07  1 in 3.7E+06  1 in 6.6E+06 |
| 10 | Caucasian  African American  Asian  Hispanic | 1 in 3.8E+27  1 in 1.4E+29  1 in 3.9E+29  1 in 2.0E+28 | Caucasian  African American  Southwest Hispanic  Southeast Hispanic | 1 in 1.4E+15  1 in 4.5E+16  1 in 7.6E+15  1 in 1.1E+15 |
| 11 | Caucasian  African American  Asian  Hispanic | 1 in 2.0E+34  1 in 1.6E+35  1 in 3.5E+29  1 in 3.3E+33 | Caucasian  African American  Southwest Hispanic  Southeast Hispanic | 1 in 4.5E+17  1 in 1.3E+19  1 in 8.3E+17  1 in 9.0E+16 |
| 12 | Caucasian  African American  Asian  Hispanic | 1 in 7.6E+30  1 in 5.1E+34  1 in 3.8E+35  1 in 2.6E+32 | Caucasian  African American  Southwest Hispanic  Southeast Hispanic | 1 in 5.8E+14  1 in 1.1E+16  1 in 5.0E+16  1 in 3.0E+15 |
| 13 | Caucasian  African American  Asian  Hispanic | 1 in 2.4E+30  1 in 3.4E+31  1 in 3.5E+35  1 in 1.2E+31 | Caucasian  African American  Southwest Hispanic  Southeast Hispanic | 1 in 2.7E+16  1 in 4.7E+16  1 in 3.0E+17  1 in 6.2E+16 |
| 14 | Caucasian  African American  Asian  Hispanic | 1 in 1.7E+35  1 in 1.2E+37  1 in 2.7E+36  1 in 3.4E+35 | Caucasian  African American  Southwest Hispanic  Southeast Hispanic | 1 in 8.3E+16  1 in 1.3E+18  1 in 4.5E+17  1 in 1.9E+17 |
| 15 | Caucasian  African American  Asian  Hispanic | 1 in 2.1E+31  1 in 4.9E+35  1 in 5.7E+34  1 in 7.5E+32 | Caucasian  African American  Southwest Hispanic  Southeast Hispanic | 1 in 1.0E+15  1 in 4.7E+16  1 in 1.0E+16  1 in 3.3E+15 |

**Figure S1:** Boxplot of intra-locus allele balance of Identity (ID) SNPs in the ForenSeq™ DNA Signature Prep Kit for individuals A, C, D, and E to show the variability of SNP intra-locus allele balance.


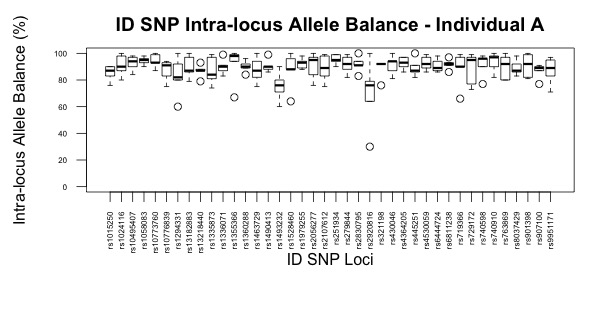


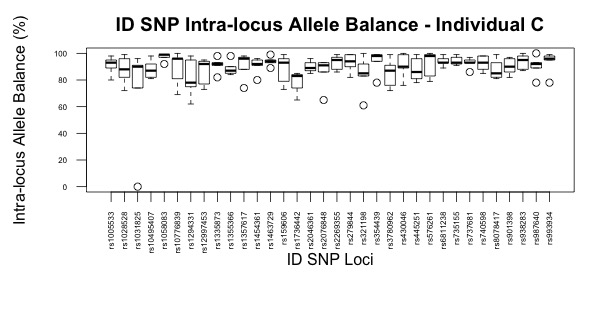


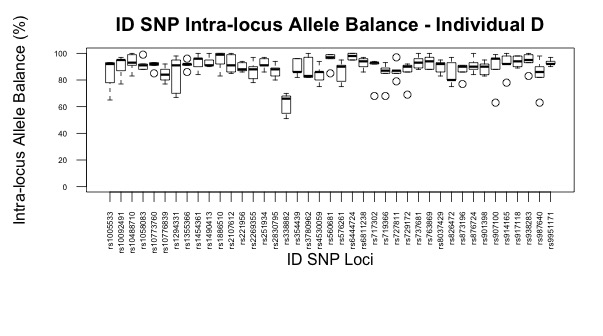


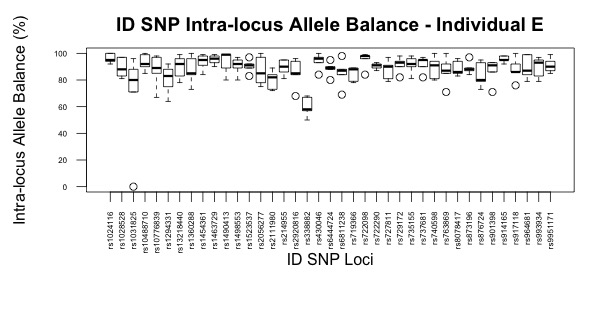

Supplement: MOESM1 [file 10985838]
